# Supplementary material
Source: PubMed Central journal article supplement (PMC3153945)
Supplement: NIHMS314247-supplement-Supplementary_Data.pdf [file NIHMS314247-supplement-Supplementary_Data.pdf]

**Supplemental Table 1. Terms from OCI developed for Clinical Trial Ontology**

| Terms               | Included in CDISC* | P-value One sided (ALL) | P-value < 0.074* | Included in CDISC and significant p-value* |
|---------------------|--------------------|-------------------------|------------------|--------------------------------------------|
| ADVERSE EVENT       | 1                  | 0.00                    | 1                | 1                                          |
| ASSESSMENT          | 1                  | 0.00                    | 1                | 1                                          |
| BASELINE            | 1                  | 0.00                    | 1                | 1                                          |
| CIP                 | 1                  | 0.00                    | 1                | 1                                          |
| COHORT              | 1                  | 0.00                    | 1                | 1                                          |
| COMPLIANCE          | 1                  | 0.00                    | 1                | 1                                          |
| CONFIDENCE INTERVAL | 1                  | 0.00                    | 1                | 1                                          |
| COST                | 0                  | 0.00                    | 1                | 0                                          |
| DATABASE            | 0                  | 0.00                    | 1                | 0                                          |
| DATE                | 0                  | 0.00                    | 1                | 0                                          |
| DRUG                | 1                  | 0.00                    | 1                | 1                                          |
| DURATION            | 0                  | 0.00                    | 1                | 0                                          |
| EC                  | 0                  | 0.00                    | 1                | 0                                          |
| EFFICACY            | 1                  | 0.00                    | 1                | 1                                          |
| ELIGIBILITY         | 0                  | 0.00                    | 1                | 0                                          |
| ENDPOINT            | 1                  | 0.00                    | 1                | 1                                          |
| EVALUATION          | 1                  | 0.00                    | 1                | 1                                          |
| EVENT               | 0                  | 0.00                    | 1                | 0                                          |
| FDA                 | 1                  | 0.00                    | 1                | 1                                          |
| FOLLOW-UP           | 0                  | 0.00                    | 1                | 0                                          |
| INCLUSION CRITERIA  | 1                  | 0.00                    | 1                | 1                                          |
| INTERVAL            | 0                  | 0.00                    | 1                | 0                                          |
| INTERVENTION        | 1                  | 0.00                    | 1                | 1                                          |
| INVESTIGATOR        | 1                  | 0.00                    | 1                | 1                                          |
| MEDICATION          | 0                  | 0.00                    | 1                | 0                                          |
| META-ANALYSIS       | 1                  | 0.00                    | 1                | 1                                          |
| OUTCOME             | 1                  | 0.00                    | 1                | 1                                          |
| PATIENT             | 1                  | 0.00                    | 1                | 1                                          |
| PHASE I TRIAL       | 1                  | 0.00                    | 1                | 1                                          |
| PHASE II TRIAL      | 1                  | 0.00                    | 1                | 1                                          |
| PHASE III TRIAL     | 1                  | 0.00                    | 1                | 1                                          |
| PLACEBO             | 1                  | 0.00                    | 1                | 1                                          |
| PRIMARY OUTCOME     | 0                  | 0.00                    | 1                | 0                                          |
| PROTOCOL            | 1                  | 0.00                    | 1                | 1                                          |
| PUBLICATION         | 0                  | 0.00                    | 1                | 0                                          |
| RESPONSE            | 0                  | 0.00                    | 1                | 0                                          |
| SAFETY              | 1                  | 0.00                    | 1                | 1                                          |
| SAMPLE SIZE         | 1                  | 0.00                    | 1                | 1                                          |
| SIDE-EFFECT         | 1                  | 0.00                    | 1                | 1                                          |
| SPONSOR             | 1                  | 0.00                    | 1                | 1                                          |
| SUBGROUP            | 0                  | 0.00                    | 1                | 0                                          |
| THERAPY             | 0                  | 0.00                    | 1                | 0                                          |
| TREATMENT           | 0                  | 0.00                    | 1                | 0                                          |
| TRIAL               | 0                  | 0.00                    | 1                | 0                                          |
| MONITORING          | 1                  | 0.00                    | 1                | 1                                          |
| BLINDING            | 1                  | 0.00                    | 1                | 1                                          |

|                        |   |      |   |   |
|------------------------|---|------|---|---|
| INFORMED CONSENT       | 1 | 0.00 | 1 | 1 |
| MONITOR                | 1 | 0.00 | 1 | 1 |
| TRIAL REPORT           | 0 | 0.00 | 1 | 0 |
| BIAS                   | 1 | 0.00 | 1 | 1 |
| SERIOUS ADVERSE EVENT  | 1 | 0.00 | 1 | 1 |
| PROGNOSTIC FACTOR      | 0 | 0.00 | 1 | 0 |
| SURROGATE MARKER       | 1 | 0.00 | 1 | 1 |
| DEVICE                 | 0 | 0.00 | 1 | 0 |
| STRATIFICATION         | 1 | 0.00 | 1 | 1 |
| EXCLUSION CRITERIA     | 1 | 0.00 | 1 | 1 |
| CCI                    | 0 | 0.00 | 1 | 0 |
| POPULATION             | 1 | 0.00 | 1 | 1 |
| PREVENTION TRIALS      | 0 | 0.00 | 1 | 0 |
| INTERIM ANALYSIS       | 1 | 0.00 | 1 | 1 |
| INSTITUTION            | 1 | 0.00 | 1 | 1 |
| POWER                  | 0 | 0.00 | 1 | 0 |
| GROUP SEQUENTIAL       | 1 | 0.00 | 1 | 1 |
| CONTROL GROUP          | 1 | 0.00 | 1 | 1 |
| MISSING DATA           | 1 | 0.00 | 1 | 1 |
| VARIABLE               | 1 | 0.00 | 1 | 1 |
| STUDY GROUP            | 0 | 0.00 | 1 | 0 |
| DROPOUT                | 1 | 0.00 | 1 | 1 |
| SUBJECT                | 0 | 0.00 | 1 | 0 |
| CLINICAL STUDY         | 1 | 0.00 | 1 | 1 |
| ANTIBIOTIC             | 0 | 0.00 | 1 | 0 |
| DDS                    | 0 | 0.00 | 1 | 0 |
| REFERENCE              | 0 | 0.00 | 1 | 0 |
| CONTEXT                | 0 | 0.00 | 1 | 0 |
| CROSSOVER              | 0 | 0.00 | 1 | 0 |
| QUESTIONNAIRE          | 1 | 0.00 | 1 | 1 |
| ADHERENCE              | 0 | 0.00 | 1 | 0 |
| RECRUITMENT            | 1 | 0.00 | 1 | 1 |
| OBSERVATION            | 1 | 0.00 | 1 | 1 |
| TYPE I ERROR           | 1 | 0.00 | 1 | 1 |
| ESTIMATE               | 0 | 0.00 | 1 | 0 |
| NEW DRUG APPLICATION   | 1 | 0.00 | 1 | 1 |
| VITAMIN                | 0 | 0.00 | 1 | 0 |
| ETHICS                 | 0 | 0.00 | 1 | 0 |
| MONITORING COMMITTEE   | 1 | 0.00 | 1 | 1 |
| DICHOTOMOUS            | 0 | 0.00 | 1 | 0 |
| GROWTH FACTOR          | 0 | 0.00 | 1 | 0 |
| TREATED GROUP          | 0 | 0.00 | 1 | 0 |
| LOCAL CONTROL          | 0 | 0.00 | 1 | 0 |
| STUDY POPULATION       | 1 | 0.00 | 1 | 1 |
| TREATMENT ALLOCATION   | 0 | 0.00 | 1 | 0 |
| INSTRUMENT             | 1 | 0.00 | 1 | 1 |
| POOL                   | 0 | 0.00 | 1 | 0 |
| ADJUSTMENT             | 0 | 0.00 | 1 | 0 |
| SEQUENTIAL DESIGN      | 0 | 0.00 | 1 | 0 |
| PRINCIPAL INVESTIGATOR | 0 | 0.00 | 1 | 0 |
| DROPOUTS               | 1 | 0.00 | 1 | 1 |

|                                      |   |      |   |   |
|--------------------------------------|---|------|---|---|
| NULL HYPOTHESIS                      | 1 | 0.00 | 1 | 1 |
| ETHICS COMMITTEE                     | 1 | 0.00 | 1 | 1 |
| VOLUNTEER                            | 1 | 0.00 | 1 | 1 |
| INSTITUTIONAL REVIEW BOARD           | 1 | 0.00 | 1 | 1 |
| CENSORING                            | 0 | 0.00 | 1 | 0 |
| EARLY TERMINATION                    | 0 | 0.00 | 1 | 0 |
| IND                                  | 0 | 0.00 | 1 | 0 |
| SELECTION BIAS                       | 0 | 0.00 | 1 | 0 |
| EQUIPOISE                            | 1 | 0.00 | 1 | 1 |
| SURROGATE OUTCOME                    | 0 | 0.00 | 1 | 0 |
| DATA MANAGEMENT                      | 1 | 0.00 | 1 | 1 |
| CASE REPORT FORM                     | 1 | 0.00 | 1 | 1 |
| ACTIVE CONTROL                       | 0 | 0.00 | 1 | 0 |
| BLOCK                                | 0 | 0.00 | 1 | 0 |
| TYPE II ERROR                        | 1 | 0.00 | 1 | 1 |
| PROCEDURE                            | 0 | 0.00 | 1 | 0 |
| ACCRUAL RATE                         | 0 | 0.00 | 1 | 0 |
| PIVOTAL TRIALS                       | 0 | 0.00 | 1 | 0 |
| INVESTIGATIONAL NEW DRUG APPLICATION | 0 | 0.00 | 1 | 0 |
| PROTOCOL VIOLATION                   | 0 | 0.00 | 1 | 0 |
| PATIENT-REPORTED OUTCOME             | 1 | 0.00 | 1 | 1 |
| VARIABILITY                          | 0 | 0.00 | 1 | 0 |
| WASHOUT PERIOD                       | 1 | 0.00 | 1 | 1 |
| QUALITY ASSURANCE                    | 1 | 0.00 | 1 | 1 |
| CONSENT FORM                         | 1 | 0.00 | 1 | 1 |
| DOUBLE BLINDING                      | 1 | 0.00 | 1 | 1 |
| CLINICAL LABORATORY                  | 0 | 0.00 | 1 | 0 |
| MULTIVARIABLE                        | 0 | 0.00 | 1 | 0 |
| P-VALUE                              | 1 | 0.00 | 1 | 1 |
| PROGENITOR                           | 0 | 0.00 | 1 | 0 |
| SPECIAL POPULATION                   | 1 | 0.00 | 1 | 1 |
| SCREENING                            | 1 | 0.00 | 1 | 1 |
| CONSORT STATEMENT                    | 0 | 0.00 | 1 | 0 |
| NONINFERIORITY                       | 0 | 0.00 | 1 | 0 |
| PACKAGE INSERT                       | 0 | 0.00 | 1 | 0 |
| FACTORIAL DESIGN                     | 0 | 0.00 | 1 | 0 |
| NONCOMPLIANCE                        | 0 | 0.00 | 1 | 0 |
| NUTRITIONAL SUPPLEMENT               | 0 | 0.00 | 1 | 0 |
| SIRE                                 | 0 | 0.00 | 1 | 0 |
| EQUIVALENCE TRIALS                   | 1 | 0.00 | 1 | 1 |
| CONFIRMATORY TRIAL                   | 1 | 0.00 | 1 | 1 |
| DATA SAFETY MONITORING COMMITTEE     | 0 | 0.00 | 1 | 0 |
| EUROPEAN MEDICINES AGENCY            | 1 | 0.00 | 1 | 1 |
| TRIAL SITE                           | 1 | 0.00 | 1 | 1 |
| NONADHERENCE                         | 0 | 0.00 | 1 | 0 |
| DOSE FINDING                         | 0 | 0.00 | 1 | 0 |
| CROSSOVER TRIAL                      | 1 | 0.00 | 1 | 1 |
| CLINICAL RESEARCH COORDINATOR        | 1 | 0.00 | 1 | 1 |
| NO-TREATMENT                         | 0 | 0.00 | 1 | 0 |
| STEERING COMMITTEE                   | 0 | 0.00 | 1 | 0 |
| CRC                                  | 0 | 0.00 | 1 | 0 |

|                                  |   |      |   |   |
|----------------------------------|---|------|---|---|
| MEDICAL DEVICE                   | 0 | 0.00 | 1 | 0 |
| STUDY COORDINATOR                | 1 | 0.00 | 1 | 1 |
| CLINICAL RESEARCH ASSOCIATE      | 1 | 0.00 | 1 | 1 |
| INVESTIGATIONAL PRODUCT          | 1 | 0.00 | 1 | 1 |
| APPROVABLE LETTER                | 1 | 0.00 | 1 | 1 |
| EMA                              | 0 | 0.00 | 1 | 0 |
| CONTRACT RESEARCH ORGANIZATION   | 0 | 0.00 | 1 | 0 |
| CV                               | 0 | 0.00 | 1 | 0 |
| TIMEPOINT                        | 0 | 0.00 | 1 | 0 |
| CONFOUNDER                       | 0 | 0.00 | 1 | 0 |
| HEALTHCARE PROVIDER              | 1 | 0.00 | 1 | 1 |
| COINTERVENTION                   | 0 | 0.00 | 1 | 0 |
| DRUG PRODUCT                     | 0 | 0.00 | 1 | 0 |
| SOURCE DOCUMENT                  | 1 | 0.00 | 1 | 1 |
| PER-PROTOCOL POPULATION          | 1 | 0.00 | 1 | 1 |
| CONFOUNDING FACTOR               | 0 | 0.00 | 1 | 0 |
| CONCURRENT CONTROLS              | 0 | 0.00 | 1 | 0 |
| ONE-SIDED TEST                   | 0 | 0.00 | 1 | 0 |
| ALTERNATIVE HYPOTHESIS           | 0 | 0.00 | 1 | 0 |
| URN RANDOMIZATION                | 0 | 0.00 | 1 | 0 |
| ELECTRONIC DATA CAPTURE          | 1 | 0.00 | 1 | 1 |
| MONITORING REPORT                | 1 | 0.00 | 1 | 1 |
| CASE REPORT                      | 1 | 0.00 | 1 | 1 |
| STATISTICAL ANALYSIS PLAN        | 1 | 0.00 | 1 | 1 |
| PRIMARY VARIABLE                 | 1 | 0.00 | 1 | 1 |
| TWO-SIDED TEST                   | 0 | 0.00 | 1 | 0 |
| SHAM TREATMENT                   | 0 | 0.00 | 1 | 0 |
| ORIGINAL DATA                    | 1 | 0.00 | 1 | 1 |
| CARRYOVER EFFECT                 | 1 | 0.00 | 1 | 1 |
| HISTORIC CONTROLS                | 0 | 0.00 | 1 | 0 |
| PROTOCOL AMENDMENT               | 1 | 0.00 | 1 | 1 |
| POSITIVE FINDINGS                | 0 | 0.00 | 1 | 0 |
| FINAL REPORT                     | 0 | 0.00 | 1 | 0 |
| ASSESSMENT BIAS                  | 0 | 0.00 | 1 | 0 |
| AUTHORSHIP                       | 0 | 0.00 | 1 | 0 |
| LOCAL RESEARCH ETHICS COMMITTEES | 0 | 0.00 | 1 | 0 |
| IRB                              | 0 | 0.00 | 1 | 0 |
| MHRA                             | 0 | 0.00 | 1 | 0 |
| ROLE                             | 1 | 0.00 | 1 | 1 |
| CLUSTER RANDOMIZATION            | 0 | 0.00 | 1 | 0 |
| BASELINE COMPARABILITY           | 0 | 0.00 | 1 | 0 |
| IMBALANCE                        | 0 | 0.00 | 1 | 0 |
| ALLOCATION RATIO                 | 0 | 0.00 | 1 | 0 |
| CLINICAL TRIAL EXEMPTION         | 1 | 0.00 | 1 | 1 |
| RESEARCH ETHICS BOARD            | 0 | 0.00 | 1 | 0 |
| FUNDER                           | 0 | 0.00 | 1 | 0 |
| RANDOMIZED POPULATION            | 0 | 0.00 | 1 | 0 |
| AUDITING                         | 1 | 0.00 | 1 | 1 |
| PHASE IV TRIAL                   | 1 | 0.00 | 1 | 1 |
| ELIGIBLE POPULATION              | 0 | 0.00 | 1 | 0 |
| AUDIT REPORT                     | 1 | 0.00 | 1 | 1 |

|                                   |   |      |   |   |
|-----------------------------------|---|------|---|---|
| NEGATIVE FINDINGS                 | 0 | 0.00 | 1 | 0 |
| STATISTICAL SIGNIFICANT           | 1 | 0.00 | 1 | 1 |
| MINORITY REPRESENTATION           | 0 | 0.00 | 1 | 0 |
| UNIVARIABLE                       | 0 | 0.00 | 1 | 0 |
| QUERY                             | 1 | 0.00 | 1 | 1 |
| PRIMARY-OUTCOME                   | 1 | 0.00 | 1 | 1 |
| OPTIMAL ALLOCATION                | 0 | 0.00 | 1 | 0 |
| REPEAT MEASUREMENT                | 0 | 0.00 | 1 | 0 |
| WARNING LETTER                    | 1 | 0.00 | 1 | 1 |
| FOOD AND DRUG ADMINISTRATION      | 1 | 0.00 | 1 | 1 |
| COORDINATING COMMITTEE            | 1 | 0.00 | 1 | 1 |
| AMENDMENT                         | 1 | 0.00 | 1 | 1 |
| INDEPENDENT ETHICS COMMITTEE      | 1 | 0.00 | 1 | 1 |
| STUDY REPORT                      | 0 | 0.00 | 1 | 0 |
| RETROSPECTIVE DESIGN              | 1 | 0.00 | 1 | 1 |
| BALANCED DESIGN                   | 1 | 0.00 | 1 | 1 |
| SURROGATE VARIABLE                | 1 | 0.00 | 1 | 1 |
| LREC                              | 0 | 0.00 | 1 | 0 |
| ANALYSIS SET                      | 1 | 0.00 | 1 | 1 |
| CCPPRB                            | 0 | 0.00 | 1 | 0 |
| LEGALLY ACCEPTABLE REPRESENTATIVE | 1 | 0.01 | 1 | 1 |
| TRIAL-DESIGN                      | 0 | 0.01 | 1 | 0 |
| MAIN EFFECT                       | 0 | 0.01 | 1 | 0 |
| ANALYZED POPULATION               | 0 | 0.01 | 1 | 0 |
| INTRASUBJECT                      | 0 | 0.01 | 1 | 0 |
| PROTOCOL EXCEPTION                | 0 | 0.01 | 1 | 0 |
| INTENTION TO TREAT                | 1 | 0.01 | 1 | 1 |
| NEYMAN ALLOCATION                 | 0 | 0.01 | 1 | 0 |
| TREATMENT-ASSIGNMENT              | 0 | 0.01 | 1 | 0 |
| EXPERIMENT                        | 0 | 0.01 | 1 | 0 |
| METABOLITE                        | 1 | 0.02 | 1 | 1 |
| APPROVAL LETTER                   | 1 | 0.02 | 1 | 1 |
| INDEPENDENT REVIEW BOARD          | 0 | 0.02 | 1 | 0 |
| ENROLLED POPULATION               | 1 | 0.02 | 1 | 1 |
| MEDICAL MONITOR                   | 1 | 0.02 | 1 | 1 |
| EXCLUDED POPULATION               | 0 | 0.02 | 1 | 0 |
| CSO                               | 0 | 0.03 | 1 | 0 |
| ASSESSMENT SCHEDULE               | 0 | 0.03 | 1 | 0 |
| INTERNAL REVIEW BOARD             | 0 | 0.03 | 1 | 0 |
| PERMUTED BLOCK RANDOMIZATION      | 0 | 0.04 | 1 | 0 |
| DOUBLE MASKING                    | 1 | 0.04 | 1 | 1 |
| QC                                | 1 | 0.04 | 1 | 1 |
| NB                                | 0 | 0.05 | 1 | 0 |
| ANALYSIS VARIABLE                 | 1 | 0.05 | 1 | 1 |
| DATA COLLECTION SCHEDULE          | 1 | 0.05 | 1 | 1 |
| SCREENED POPULATION               | 0 | 0.05 | 1 | 0 |
| ACTION LETTER                     | 0 | 0.06 | 1 | 0 |
| DIAGNOSTIC TRIAL                  | 0 | 0.06 | 1 | 0 |
| PATIENT FILE                      | 1 | 0.07 | 1 | 1 |
| MREC                              | 0 | 0.09 | 0 | 0 |
| NUTRIENT                          | 0 | 0.12 | 0 | 0 |

|                           |   |      |   |   |
|---------------------------|---|------|---|---|
| WITHDRAWAL CONSENT        | 1 | 0.12 | 0 | 0 |
| NUMERIC DATA              | 0 | 0.14 | 0 | 0 |
| EXECUTIVE COMMITTEE       | 0 | 0.16 | 0 | 0 |
| PROJECT MANAGEMENT        | 0 | 0.16 | 0 | 0 |
| DERIVED DATA              | 1 | 0.18 | 0 | 0 |
| DATA OWNER                | 0 | 0.19 | 0 | 0 |
| TEXTUAL DATA              | 0 | 0.20 | 0 | 0 |
| ELECTRONIC SIGNATURE      | 1 | 0.22 | 0 | 0 |
| POPULATION REPRESENTATIVE | 0 | 0.22 | 0 | 0 |
| CLINICAL DOCUMENT         | 1 | 0.22 | 0 | 0 |
| ERRATUM                   | 0 | 0.23 | 0 | 0 |
| INTERSUBJECT              | 0 | 0.27 | 0 | 0 |
| CASE-CONTROL DESIGN       | 0 | 0.28 | 0 | 0 |
| RECRUITED POPULATION      | 0 | 0.29 | 0 | 0 |
| VULNERABLE SUBJECT        | 1 | 0.31 | 0 | 0 |
| ANTIBODY                  | 0 | 0.32 | 0 | 0 |
| MASKING                   | 0 | 0.39 | 0 | 0 |
| CONTACT PERSON            | 0 | 0.39 | 0 | 0 |
| DOCUMENT ROLE             | 1 | 0.49 | 0 | 0 |
| SUPPLIER                  | 1 | 0.55 | 0 | 0 |
| PATHOLOGIST               | 0 | 0.63 | 0 | 0 |
| POSITIVE CONTROL          | 0 | 0.66 | 0 | 0 |
| CRB                       | 0 | 0.73 | 0 | 0 |
| DAM                       | 0 | 0.74 | 0 | 0 |
| CONTINUOUS                | 0 | 0.85 | 0 | 0 |
| VITAL DYE                 | 0 | 0.87 | 0 | 0 |
| SURVEY                    | 1 | 0.90 | 0 | 0 |
| RANDOM SAMPLE             | 0 | 0.93 | 0 | 0 |
| PSEUDORANDOM              | 0 | 0.94 | 0 | 0 |
| ANTIGEN                   | 0 | 0.97 | 0 | 0 |
| DETERMINISTIC             | 0 | 0.99 | 0 | 0 |
| CONSTRAIN                 | 0 | 1.00 | 0 | 0 |
| EPITOPE                   | 0 | 1.00 | 0 | 0 |
| NEGATIVE CONTROL          | 0 | 1.00 | 0 | 0 |
| CASE HISTORY              | 1 | 1.00 | 0 | 0 |
| STUDY ROLE                | 0 | 1.00 | 0 | 0 |
| CHR                       | 0 | 1.00 | 0 | 0 |
| BLA                       | 0 | 1.00 | 0 | 0 |
| REB                       | 0 | 1.00 | 0 | 0 |
| CRA                       | 0 | 1.00 | 0 | 0 |
| REGULATORY ROLE           | 0 | 1.00 | 0 | 0 |
| BEDDING                   | 0 | 1.00 | 0 | 0 |
| CODING                    | 1 | 1.00 | 0 | 0 |
| CONTRACT                  | 0 | 1.00 | 0 | 0 |
| CONTROL VALUE             | 0 | 1.00 | 0 | 0 |
| CONTROLS                  | 1 | 1.00 | 0 | 0 |
| CULTURE MEDIUM            | 0 | 1.00 | 0 | 0 |
| DISCRET                   | 0 | 1.00 | 0 | 0 |
| DYE                       | 0 | 1.00 | 0 | 0 |
| EAB                       | 0 | 1.00 | 0 | 0 |
| FEED                      | 0 | 1.00 | 0 | 0 |

|             |   |           |   |   |
|-------------|---|-----------|---|---|
| HEX         | 0 | 1.00      | 0 | 0 |
| IEC         | 1 | 1.00      | 0 | 0 |
| INTERACTION | 1 | 1.00      | 0 | 0 |
| LABEL       | 1 | 1.00      | 0 | 0 |
| OFFSPRING   | 0 | 1.00      | 0 | 0 |
| ORIGIN      | 0 | 1.00      | 0 | 0 |
| PMA         | 1 | 1.00      | 0 | 0 |
| REAGENT     | 0 | 1.00      | 0 | 0 |
| REPORTER    | 0 | 1.00      | 0 | 0 |
| SPECIMEN    | 0 | 1.00      | 0 | 0 |
| STAIN       | 0 | 1.00      | 0 | 0 |
| SUBSTRATE   | 0 | 1.00      | 0 | 0 |
| TOME        | 1 | 1.00      | 0 | 0 |
| COMPARATOR  | 1 | 1.0e-312  | 0 | 0 |
| REASON      | 0 | 1.34e-319 | 0 | 0 |

\* 1=Yes 0=No
